# Supplementary material
Source: publisher site journal article supplement (https://www.dovepress.com/get_supplementary_file.php?f=306621.docx)
Supplement: Supplementary file 1 [file get_supplementary_file.php]

**Appendix 1**.Rheumatologic disease vs Ocular symptoms.

| **Ocular symptoms / Rheumatologic disease** | **Ocular pain** | **Photophobia** | **Foreign body sensation** | **Tearing** | **Red-eye** | **Decreased Visual Acuity** | **Pruritus** | **Burning** | **Floaters** | **Dry eye** | **Diplopia** |
| --- | --- | --- | --- | --- | --- | --- | --- | --- | --- | --- | --- |
| Rheumatoid Arthritis | 9 (3.4%) | 2 (0.75%) | 1 (0.37%) | 3 (1.12%) | 10 (3.77%) | 4 (1.5%) | 2 (0.75%) | 3 (1.12%) | 3 (1.13%) | 72 (27%) | 0 |
| Systemic Lupus Erythematosus | 1 (1.27%) | 6 (7.6%)** | 0 | 0 | 2 (2.5%) | 2 (2.5%) | 0 | 0 | 0 | 28 (35.9%) | 1 (1.27%) |
| Reactive Arthritis | 0 | 0 | 0 | 0 | 0 | 0 | 0 | 0 | 0 | 1 (20%) | 0 |
| Psoriatic Arthritis | 0 | 0 | 0 | 0 | 0 | 0 | 0 | 0 | 0 | 1 (5.26%)* | 0 |
| Localized Scleroderma | 0 | 0 | 0 | 0 | 0 | 0 | 0 | 0 | 0 | 3 (23.07%) | 0 |
| Systemic Sclerosis | 0 | 0 | 1 (2.3%) | 0 | 1 (2.3%) | 1 (2.3%) | 0 | 0 | 0 | 19 (45.23%)*** | 0 |
| Dermatomyositis | 0 | 0 | 0 | 0 | 0 | 2 (28.57%)* | 0 | 0 | 0 | 1 (14.28%) | 0 |
| Multiple Sclerosis | 1 (20%) | 1 (20%) | 1 (20%)** | 0 | 0 | 0 | 0 | 0 | 0 | 2 (40%) | 0 |
| Hashimoto Thyroiditis | 0 | 0 | 0 | 0 | 0 | 0 | 0 | 0 | 0 | 11 (55%)* | 0 |
| Graves’ Disease | 1 (10%) | 1 (10%) | 1 (10%) | 0 | 1 (10%) | 0 | 0 | 0 | 0 | 0 | 0 |
| Vitiligo | 0 | 0 | 0 | 0 | 0 | 0 | 0 | 0 | 0 | 1 (33.33%) | 0 |
| Ankylosing spondylitis | 2 (8%) | 1 (4%) | 0 | 0 | 1 (4%) | 1 (4%) | 0 | 1 (4%) | 0 | 3 (12%)*** | 0 |
| Axial undifferentiated Spondyloarthritis | 0 | 0 | 0 | 0 | 1 (5.55%) | 0 | 0 | 0 | 0 | 5 (27.77%) | 0 |
| Reiter Syndrome | 0 | 0 | 0 | 0 | 1 (50%)* | 0 | 0 | 0 | 0 | 1 (50%) | 0 |
| Antiphospholipid Syndrome | 0 | 0 | 0 | 0 | 1 (2.32%) | 1 (2.32%) | 0 | 0 | 0 | 13 (30.23%) | 2 (4.65%)** |
| Type 1 Diabetes | 0 | 0 | 0 | 0 | 0 | 0 | 0 | 0 | 0 | 1 (100%) | 0 |
| Mixed connective tissue disease | 0 | 0 | 0 | 0 | 0 | 0 | 0 | 0 | 0 | 1 (25%) | 0 |
| Undifferentiated Vasculitis | 1 (10%) | 0 | 0 | 0 | 1 (10%) | 1 (10%) | 0 | 0 | 0 | 1 (10%) | 1 (10%)** |
| Large size Vessel Vasculitis | 1 (50%)*** | 0 | 0 | 0 | 0 | 2 (100%)** | 0 | 0 | 0 | 0 | 0 |
| Medium size Vessel Vasculitis | 0 | 0 | 0 | 0 | 0 | 1 (33.3%) | 0 | 0 | 1 (33.3%)* | 0 | 0 |
| Small size vessel vasculitis associated to ANCA | 1 (33.3%) | 0 | 0 | 0 | 0 | 0 | 0 | 0 | 0 | 0 | 0 |
| Vasculitis associated to systemic disease | 1 (33.3%) | 0 | 0 | 0 | 0 | 0 | 0 | 0 | 0 | 1 (33.3%) | 0 |
| Behcet Disease | 0 | 0 | 0 | 0 | 0 | 0 | 0 | 0 | 0 | 1 (33.3%) | 0 |
| Sarcoidosis | 0 | 0 | 0 | 0 | 0 | 0 | 0 | 0 | 0 | 1 (33.3%) | 0 |
| Sjogren Syndrome | 4 (2.56%) | 3 (1.91%) | 2 (1.27%) | 2 (1.27%) | 6 (3.82%) | 6 (3.82%) | 1 (0.63%) | 2 (1.27%) | 1 (0.63%) | 113 (72.43%)** | 0 |
| Pernicious Anemia | 0 | 0 | 0 | 0 | 0 | 0 | 0 | 0 | 0 | 2 (100%) | 0 |
| Chron Disease | 0 | 0 | 0 | 0 | 0 | 0 | 0 | 0 | 0 | 1 (33.3%) | 0 |
| Celiac Disease | 0 | 0 | 0 | 0 | 0 | 0 | 0 | 0 | 0 | 1 (100%) | 0 |
| Neuromyelitis Optica | 0 | 1 (50%)* | 0 | 0 | 0 | 1 (50%)* | 0 | 0 | 0 | 1 (50%) | 0 |
| Myasthenia Gravis | 0 | 0 | 0 | 0 | 0 | 1 (50%)* | 0 | 0 | 0 | 1 (50%) | 1 (50%)** |
| Psoriasis | 0 | 0 | 0 | 0 | 0 | 0 | 0 | 0 | 0 | 1 (5.88%)* | 0 |
| Pemphigoid | 0 | 0 | 0 | 0 | 0 | 0 | 0 | 0 | 0 | 1 (100%) | 0 |
| Autoimmune Hepatitis | 0 | 0 | 0 | 0 | 1 (12.25%) | 1 (12.25%) | 0 | 0 | 1 (12.25%) | 3 (37.5%) | 0 |
| Sclerosing Cholangitis | 0 | 0 | 0 | 0 | 0 | 0 | 0 | 0 | 0 | 1 (100%) | 0 |
| Polymyalgia Rheumatica | 2 (5.57%) | 0 | 0 | 0 | 1 (2.85%) | 2 (5.71%) | 1 (2.85%) | 1 (2.85%) | 0 | 8 (22.85%) | 0 |
| Fibromyalgia | 3 (1.67%) | 1 (0.55%) | 0 | 2 (1.10%) | 3 (1.66%) | 2 (1.10%) | 3 (1.66%)*** | 0 | 3 (1.66%) | 57 (31.49%) | 0 |
| Polyautoimmunity | 0 | 1 (1.81%) | 0 | 0 | 1 (1.81%) | 2 (3.63%) | 0 | 0 | 0 | 23 (41.81%) | 1 (1.81%) |
| Undifferentiated connective tissue disease | 2 (4.34%) | 0 | 0 | 1 (2.17%) | 2 (4.34%) | 2 (4.34%) | 1 (2.17%) | 0 | 1 (2.17%) | 14 (30.43%) | 0 |

Note: p-value is based in chi squared proof with a 95% (*) and 99% (**) confidence level. *** p-value asymptotically significant for a 95% confidence level.

**Appendix 2.1** Diseases vs Ophthalmologic diagnosis part 1

| **Ophthalmological / Rheumatologic diseases** | **Keratitis** | **Conjunctivitis** | **Kerato**  **conjunctivitis sicca** | **Ocular Surface Squamous Neoplasia** | **Peripheral Ulcerative Keratitis** | **Corneal perforation** | | **Cataract** | **Uveitis** | **Anterior uveitis** | **Posterior uveitis** | **Panuveitis** |
| --- | --- | --- | --- | --- | --- | --- | --- | --- | --- | --- | --- | --- |
| Rheumatoid Arthritis | 2 (0.75%) | 1 (0.37%) | 34 (12.78%) | 2 (0.75%) | 1 (0.37%) | 1 (0.37%) | 4 (1.5%) | | 3 (1.13%) | 1 (0.37%) | 0 | 0 |
| Systemic lupus erythematosus | 2 (2.5%) | 1 (1.26%) | 16 (20.25%) | 0 | 0 | 0 | 1 (1.26%) | | 0 | 0 | 0 | 0 |
| Localized Scleroderma | 0 | 0 | 1 (7.7%) | 0 | 0 | 0 | 0 | | 0 | 0 | 0 | 0 |
| Systemic Sclerosis | 1 (2.32%) | 0 | 9 (21.42%) | 0 | 0 | 0 | 0 | | 0 | 0 | 0 | 0 |
| Polymyositis | 0 | 0 | 1 (50%) | 0 | 0 | 0 | 0 | | 0 | 0 | 0 | 0 |
| Dermatomyositis | 0 | 0 | 1 (14.28%) | 0 | 0 | 0 | 1(14.28%) | | 0 | 0 | 0 | 0 |
| Multiple Sclerosis | 0 | 0 | 1 (20%) | 0 | 0 | 0 | 1 (20%) | | 1 (20%) | 0 | 0 | 0 |
| Hashimoto Thyroiditis | 0 | 0 | 6 (30%) | 0 | 0 | 0 | 0 | | 0 | 0 | 0 | 0 |
| Vitiligo | 0 | 0 | 1 (33.33%) | 0 | 0 | 0 | 0 | | 0 | 0 | 0 | 0 |
| Axial Spondyloarthritis | 0 | 0 | 0 | 0 | 0 | 0 | 1 (4%) | | 1 (4%) | 1 (4%) | 0 | 0 |
| Undifferentiated Spondyloarthritis | 0 | 0 | 0 | 0 | 0 | 0 | 0 | | 3 (16%)** | 0 | 0 | 0 |
| Reiter Syndrome | 0 | 1 (50%)** | 0 | 0 | 0 | 0 | 0 | | 0 | 0 | 0 | 0 |
| Antiphospholipid Syndrome | 0 | 1 (2.32%) | 7 (16.27%) | 0 | 0 | 0 | 0 | | 0 | 0 | 0 | 0 |
| Undifferentiated Vasculitis | 0 | 0 | 0 | 0 | 0 | 0 | 0 | | 1 (10%) | 0 | 0 | 0 |
| Small size vessel vasculitis associated to ANCA | 0 | 0 | 0 | 0 | 0 | 0 | 0 | | 1 (33.33%)* | 0 | 0 | 0 |
| Vasculitis associated to systemic disease | 0 | 0 | 0 | 0 | 0 | 0 | 0 | | 1 (33.33%)* | 0 | 0 | 0 |
| Behcet Disease | 0 | 0 | 0 | 0 | 0 | 0 | 0 | | 1 (33.33%)* | 1 (33.33%)* | 1 (33.3%)* | 1 (33.33%)* |
| Sjogren Syndrome | 6 (3.82%)** | 1 (0.63%) | 121 (77.07%)** | 0 | 1 (0.63%) | 1 (0.63%) | 1 (0.63%) | | 2 (1.27%) | 2 (1.27%) | 0 | 0 |
| Chron Disease | 0 | 0 | 1 (25%) | 0 | 0 | 0 | 0 | | 0 | 0 | 0 | 0 |
| Celiac Disease | 0 | 0 | 1 (100%) | 0 | 0 | 0 | 0 | | 0 | 0 | 0 | 0 |
| Neuromyelitis Optica | 0 | 1 (50%)** | 0 | 0 | 0 | 0 | 0 | | 0 | 0 | 0 | 0 |
| Psoriasis | 0 | 0 | 0 | 0 | 0 | 0 | 0 | | 1 (5.55%) | 0 | 0 | 0 |
| Primary sclerosing cholangitis | 0 | 0 | 1 (50%) | 0 | 0 | 0 | 0 | | 0 | 0 | 0 | 0 |
| Autoimmune Hepatitis | 0 | 0 | 1 (12.5%) | 0 | 0 | 0 | 0 | | 0 | 0 | 0 | 0 |
| Polymyalgia Rheumatica | 0 | 0 | 3 (8.57%) | 0 | 0 | 0 | 1 (2.85%) | | 0 | 0 | 0 | 0 |
| Fibromyalgia | 2 (1.1%) | 0 | 28 (15.46%) | 0 | 0 | 0 | 1 (0.55%) | | 1 (0.55%) | 0 | 0 | 0 |
| Polyautoimmunity | 0 | 1 (1.81%) | 20 (33.36%)** | 0 | 0 | 0 | 0 | | 1 (1.81%) | 0 | 0 | 0 |
| Undifferentiated connective tissue disease | 0 | 0 | 5 (10.86%) | 0 | 0 | 0 | 0 | | 0 | 0 | 0 | 0 |

Note: p-value is based in chi squared proof with a 95% (*) and 99% (**) confidence level.

**Appendix 2.2** Diseases vs Ophthalmologic diagnosis part 2

| **Ophthalmological / Rheumatologic diseases** | **Exophthalmos** | **Glaucoma** | **Optic neuritis** | **Retinal vasculitis** | **Macular edema** | **Central Retinal Artery Occlusion** | **Maculopathy** | **Scleritis** | **Episcleritis** | **Blind eye** | **Retinal detachment** |
| --- | --- | --- | --- | --- | --- | --- | --- | --- | --- | --- | --- |
| Rheumatoid Arthritis | 0 | 2 (0.75%) | 0 | 0 | 1 (0.37%) | 0 | 3 (1.12%) | 6 (2.25%) | 1 (0.37%) | 0 | 1 (0.37%) |
| Systemic lupus erythematosus | 0 | 0 | 2 (2.5%) | 0 | 0 | 0 | 0 | 0 | 0 | 0 | 0 |
| Psoriatic Arthritis | 0 | 1 (5.2%) | 0 | 0 | 0 | 0 | 0 | 0 | 0 | 0 | 0 |
| Systemic Sclerosis | 0 | 0 | 0 | 0 | 0 | 0 | 0 | 0 | 0 | 0 | 1 (2.38%)* |
| Dermatomyositis | 0 | 0 | 1 (14.28%)* | 0 | 0 | 0 | 0 | 0 | 0 | 0 | 0 |
| Multiple Sclerosis | 0 | 0 | 2 (40%)** | 0 | 0 | 0 | 0 | 0 | 0 | 0 | 0 |
| Graves’ Disease | 1 (10%)** | 0 | 0 | 0 | 0 | 0 | 0 | 0 | 0 | 0 | 0 |
| Axial Spondyloarthritis | 0 | 0 | 0 | 0 | 0 | 0 | 0 | 1 (4%) | 0 | 0 | 0 |
| Antiphospholipid Syndrome | 0 | 0 | 0 | 0 | 1 (2.32%)* | 0 | 0 | 0 | 0 | 0 | 1 (2.32%)* |
| Undifferentiated Vasculitis | 0 | 0 | 0 | 0 | 0 | 0 | 0 | 1 (10%) | 1 (10%)* | 0 | 0 |
| Large size Vessel Vasculitis | 1 (50%)** | 0 | 0 | 0 | 0 | 0 | 0 | 0 | 0 | 0 | 0 |
| Medium size Vessel Vasculitis | 0 | 0 | 1 (33.33%)** | 0 | 0 | 0 | 0 | 0 | 0 | 0 | 0 |
| Small size vessel vasculitis associated to ANCA | 0 | 0 | 0 | 0 | 0 | 0 | 0 | 0 | 0 | 1 (33.33%)** | 0 |
| Vasculitis associated to systemic disease | 0 | 0 | 0 | 0 | 0 | 0 | 0 | 0 | 0 | 1 (33.33%)** | 0 |
| Sjogren Syndrome | 0 | 2 (1.27%) | 2 (1.27%) | 0 | 0 | 1 (0.63%) | 1 (0.63%) | 3 (1.91%) | 1 (0.63%) | 0 | 1 (0.63%) |
| Neuromyelitis Optica | 0 | 0 | 2 (100%)** | 0 | 0 | 0 | 0 | 0 | 0 | 0 | 0 |
| Psoriasis | 0 | 1 (5.55%) | 0 | 0 | 0 | 0 | 0 | 0 | 0 | 0 | 0 |
| primary sclerosing cholangitis | 0 | 0 | 0 | 0 | 0 | 0 | 0 | 0 | 0 | 0 | 1 (50%)** |
| Autoimmune Hepatitis | 0 | 0 | 0 | 0 | 0 | 0 | 1 (12.5%)* | 0 | 0 | 0 | 0 |
| polymyalgia Rheumatica | 1 (2.85%) | 0 | 0 | 0 | 0 | 0 | 0 | 0 | 0 | 0 | 0 |
| Fibromyalgia | 0 | 2 (1.1%) | 1 (0.55%) | 0 | 0 | 0 | 2 (1.1%) | 0 | 0 | 0 | 0 |
| Polyautoimmunity | 0 | 0 | 1 (1.81%) | 0 | 1 (1.81%) | 0 | 0 | 0 | 0 | 0 | 1 (1.81%) |
| Undifferentiated connective tissue disease | 0 | 0 | 0 | 0 | 0 | 1 (2.17%)*** | 1 (2.17%) | 2 (4.34%) | 0 | 0 | 0 |

Note: p-value is based in chi squared proof with a 95% (*) and 99% (**) confidence level. *** p-value asymptotically significant for a 95% confidence level.
